# Supplementary material for: Continuum of neurobehaviour and its associations with brain MRI in infants born preterm
Source: PubMed Central journal article supplement — BMJ Paediatr Open. 2017 Oct 5;1(1):e000136. doi: 10.1136/bmjpo-2017-000136 (PMC5862173; doi:10.1136/bmjpo-2017-000136), 2017-10-05
Supplement: bmjpo-2017-000136supp001.pdf [file bmjpo-2017-000136supp001.pdf]

Supplementary Table 1a: Differences in infant characteristics for those infants with and without HNNE data across three gestational age groups

|                                            | <b>VPT<br/>with<br/>HNNE<br/>data</b> | <b>VPT<br/>no<br/>HNNE<br/>data</b> | <b>Mean<br/>difference<br/>(95% CI),<br/>p-value</b> | <b>MLPT<br/>with<br/>HNNE<br/>data</b> | <b>MLPT<br/>no<br/>HNNE<br/>data</b> | <b>Mean<br/>difference<br/>(95% CI), p-<br/>value</b> | <b>TERM<br/>with<br/>HNNE<br/>data</b> | <b>TERM<br/>no<br/>HNNE<br/>data</b> | <b>Mean<br/>difference<br/>(95% CI),<br/>p-value</b> |
|--------------------------------------------|---------------------------------------|-------------------------------------|------------------------------------------------------|----------------------------------------|--------------------------------------|-------------------------------------------------------|----------------------------------------|--------------------------------------|------------------------------------------------------|
|                                            | <b>n=133</b>                          | <b>n=10</b>                         | <b>or</b>                                            | <b>n=196</b>                           | <b>n=5</b>                           | <b>or</b>                                             | <b>n=186</b>                           | <b>n=15</b>                          | <b>or</b>                                            |
|                                            |                                       |                                     | <b>Chi 2<br/>(p-value)</b>                           |                                        |                                      | <b>Chi 2<br/>(p-value)</b>                            |                                        |                                      | <b>Chi 2 (p-<br/>value)</b>                          |
| Postnatal corticosteroids n (%)            | 12 (9)                                | 4 (40)                              | 8.98 (0.003)                                         | 0                                      | 0                                    |                                                       | 0                                      | 0                                    |                                                      |
| Multiple birth n (%)                       | 59 (44)                               | 4 (40)                              | 0.07 (0.79)                                          | 71 (36)                                | 3 (60)                               | 1.18 (0.28)                                           | 2 (1)                                  | 0 (0)                                | 0.16 (0.69)                                          |
| Caesarean delivery n (%)                   | 97 (73)                               | 8 (80)                              | 0.24 (0.63)                                          | 133 (68)                               | 4 (80)                               | 0.33 (0.57)                                           | 72 (39)                                | 5 (33)                               | 0.17 (0.68)                                          |
| Gestational age at birth (weeks) mean (SD) | 27.8 (1.5)                            | 27.2 (1.5)                          | -0.59 (-1.54 to 0.37), 0.23                          | 34.4 (1.3)                             | 34.1 (0.4)                           | -0.35 (-1.46 to 0.76), 0.53                           | 39.7 (1.2)                             | 40.2 (1.3)                           | 0.52 (-0.12 to 1.16), 0.11                           |
| Birth weight z-score mean (SD)             | -0.41 (1.02)                          | -0.97 (1.11)                        | -0.57 (-1.23 to 0.10), 0.09                          | -0.35 (1.2)                            | -0.43 (0.6)                          | -0.08 (-1.12 to 0.96), 0.88                           | 0.23 (0.82)                            | 0.04 (0.84)                          | -0.19 (-0.62 to 0.25), 0.39                          |
| Male n (%)                                 | 66 (50)                               | 5 (50)                              | 0.0005 (0.98)                                        | 94 (48)                                | 2 (40)                               | 0.12 (0.73)                                           | 99 (53)                                | 8 (53)                               | 0.0001 (0.99)                                        |
| Respiratory distress at birth n (%)        | 130 (98)                              | 10 (100)                            | 0.23 (0.63)                                          | 44 (22)                                | 1 (20)                               | 0.02 (0.90)                                           | 0                                      | 0                                    |                                                      |

Supplementary Table 1b: Differences in infant characteristics for those infants with and without NNNS data across three gestational age groups

|                                            | <b>VPT<br/>with<br/>NNNS<br/>data<br/><br/>n=130</b> | <b>VPT<br/>no<br/>NNNS<br/>data<br/><br/>n=13</b> | <b>Mean<br/>difference<br/>(95% CI),<br/>p-value<br/><br/>or<br/><br/>Chi 2<br/>(p-value)</b> | <b>MLPT<br/>with<br/>NNNS<br/>data<br/><br/>n=187</b> | <b>MLPT<br/>no<br/>NNNS<br/>data<br/><br/>n=14</b> | <b>Mean<br/>difference<br/>(95% CI), p-<br/>value<br/><br/>or<br/><br/>Chi 2<br/>(p-value)</b> | <b>TERM<br/>with<br/>NNNS<br/>data<br/><br/>n=183</b> | <b>TERM<br/>no<br/>NNNS<br/>data<br/><br/>n=18</b> | <b>Mean<br/>difference<br/>(95% CI),<br/>p-value<br/><br/>or<br/><br/>Chi 2 (p-<br/>value)</b> |
|--------------------------------------------|------------------------------------------------------|---------------------------------------------------|-----------------------------------------------------------------------------------------------|-------------------------------------------------------|----------------------------------------------------|------------------------------------------------------------------------------------------------|-------------------------------------------------------|----------------------------------------------------|------------------------------------------------------------------------------------------------|
| Postnatal corticosteroids n (%)            | 11 (8)                                               | 5 (38)                                            | 10.70 (0.001)                                                                                 | 0                                                     | 0                                                  |                                                                                                | 0                                                     | 0                                                  |                                                                                                |
| Multiple birth n (%)                       | 57 (44)                                              | 6 (46)                                            | 0.03 (0.87)                                                                                   | 65 (35)                                               | 9 (64)                                             | 4.88 (0.02)                                                                                    | 2 (1)                                                 | 0 (0)                                              | 0.20 (0.66)                                                                                    |
| Caesarean delivery n (%)                   | 96 (74)                                              | 9 (69)                                            | 0.13 (0.72)                                                                                   | 128 (68)                                              | 9 (64)                                             | 0.10 (0.75)                                                                                    | 71 (39)                                               | 6 (33)                                             | 0.21 (0.65)                                                                                    |
| Gestational age at birth (weeks) mean (SD) | 27.9 (1.4)                                           | 26.8 (1.6)                                        | -1.07 (-1.90 to -0.24), 0.01                                                                  | 34.4 (1.3)                                            | 34.3 (0.8)                                         | -0.14 (-0.83 to 0.54), 0.67                                                                    | 39.7 (1.2)                                            | 40.3 (1.2)                                         | 0.56 (-0.03 to 1.14), 0.06                                                                     |
| Birth weight z-score mean (SD)             | -0.39 (1.01)                                         | -0.98 (1.10)                                      | -0.59 (-1.18 to -0.00), 0.05                                                                  | -0.32 (1.2)                                           | -0.74 (1)                                          | -0.41 (-1.04 to 0.22), 0.20                                                                    | 0.22 (0.82)                                           | 0.16 (0.85)                                        | -0.09 (-0.46 to 0.34), 0.77                                                                    |
| Male n (%)                                 | 64 (49)                                              | 7 (54)                                            | 0.10 (0.75)                                                                                   | 88 (47)                                               | 8 (57)                                             | 0.53 (0.47)                                                                                    | 97 (53)                                               | 10 (56)                                            | 0.04 (0.84)                                                                                    |
| Respiratory distress at birth n (%)        | 127 (98)                                             | 13 (100)                                          | 0.31 (0.58)                                                                                   | 43 (23)                                               | 2 (14)                                             | 0.57 (0.45)                                                                                    | 0                                                     | 0                                                  |                                                                                                |

Supplementary Table 1c: Differences in infant characteristics for those infants with and without GMA data across three gestational age groups

|                                            | <b>VPT<br/>with<br/>GMA<br/>data</b> | <b>VPT<br/>no GMA<br/>data</b> | <b>Mean<br/>difference<br/>(95% CI),<br/>p-value</b> | <b>MLPT<br/>with<br/>GMA<br/>data</b> | <b>MLPT<br/>no<br/>GMA<br/>data</b> | <b>Mean<br/>difference<br/>(95% CI), p-<br/>value</b> | <b>TERM<br/>with<br/>GMA<br/>data</b> | <b>TERM<br/>no<br/>GMA<br/>data</b> | <b>Mean<br/>difference<br/>(95% CI),<br/>p-value</b> |
|--------------------------------------------|--------------------------------------|--------------------------------|------------------------------------------------------|---------------------------------------|-------------------------------------|-------------------------------------------------------|---------------------------------------|-------------------------------------|------------------------------------------------------|
|                                            | <b>n=113</b>                         | <b>n=30</b>                    | <b>or</b>                                            | <b>n=154</b>                          | <b>n=47</b>                         | <b>or</b>                                             | <b>n=142</b>                          | <b>n=59</b>                         | <b>or</b>                                            |
|                                            |                                      |                                | <b>Chi 2<br/>(p-value)</b>                           |                                       |                                     | <b>Chi 2<br/>(p-value)</b>                            |                                       |                                     | <b>Chi 2 (p-<br/>value)</b>                          |
| Postnatal corticosteroids n (%)            | 14 (12)                              | 2 (7)                          | 0.78 (0.38)                                          | 0                                     | 0                                   |                                                       | 0                                     | 0                                   |                                                      |
| Multiple birth n (%)                       | 47 (42)                              | 16 (53)                        | 1.33 (0.25)                                          | 56 (36)                               | 18 (38)                             | 0.06 (0.81)                                           | 0 (0)                                 | 2 (3)                               | 4.86 (0.03)                                          |
| Caesarean delivery n (%)                   | 79 (70)                              | 26 (87)                        | 3.41 (0.07)                                          | 106 (69)                              | 31 (66)                             | 0.14 (0.71)                                           | 52 (37)                               | 25 (42)                             | 0.58 (0.45)                                          |
| Gestational age at birth (weeks) mean (SD) | 27.7 (1.6)                           | 28.0 (1.1)                     | 0.34 (-0.25 to 0.94), 0.26                           | 34.5 (1.3)                            | 34.1 (1.0)                          | -0.37 (-0.78 to 0.03), 0.07                           | 39.8 (1.2)                            | 39.6 (1.3)                          | -0.28 (-0.65 to 0.09), 0.14                          |
| Birth weight z-score mean (SD)             | -0.43 (1.02)                         | -0.53 (1.10)                   | -0.10 (-0.52 to 0.32), 0.64                          | -0.35 (1.2)                           | -0.36 (1.1)                         | -0.01 (-0.39 to 0.37), 0.97                           | 0.23 (0.82)                           | 0.17 (0.82)                         | -0.06 (-0.31 to 0.19), 0.63                          |
| Male n (%)                                 | 55 (49)                              | 16 (53)                        | 0.21 (0.65)                                          | 73 (47)                               | 23 (49)                             | 0.03 (0.85)                                           | 79 (56)                               | 28 (47)                             | 1.12 (0.29)                                          |
| Respiratory distress at birth n (%)        | 112 (99)                             | 28 (93)                        | 3.86 (0.05)                                          | 34 (22)                               | 11 (23)                             | 0.04 (0.85)                                           | 0                                     | 0                                   |                                                      |
